1                   **An essential checkpoint for TLR9 signaling is release from Unc93b1 in endosomes**

2  
3                   Olivia Majer<sup>1</sup>, Brian J Woo<sup>1</sup>, Bo Liu<sup>1</sup>, Erik Van Dis<sup>1</sup>, and Gregory M Barton\*<sup>1</sup>

4  
5                   <sup>1</sup>Division of Immunology and Pathogenesis, Department of Molecular and Cell Biology, University of  
6                   California, Berkeley, CA 94720, USA.

7  
8                   \*Correspondence to: [barton@berkeley.edu](mailto:barton@berkeley.edu)

9        **Abstract:**

10        Nucleic acid-sensing Toll-like receptors (TLRs) are subject to complex regulation to facilitate recognition  
11        of microbial DNA and RNA while limiting recognition of self-nucleic acids<sup>1</sup>. Failure to properly regulate  
12        nucleic acid-sensing TLRs can lead to autoimmune and autoinflammatory disease<sup>2-6</sup>. Intracellular  
13        localization of these receptors is thought to be critical for self vs. non-self discrimination<sup>7</sup>, yet the  
14        molecular mechanisms that reinforce compartmentalized activation of intracellular TLRs remain poorly  
15        understood. Here we describe a new mechanism that prevents TLR9 activation from locations other than  
16        endosomes. This control is achieved through the regulated release of TLR9 from its trafficking chaperone  
17        Unc93b1, which only occurs within endosomes and is required for ligand binding and signal transduction.  
18        Mutations in Unc93b1 that increase affinity for TLR9 impair release and result in defective signaling. The  
19        release is specific to TLR9, as TLR7 does not dissociate from Unc93b1 in endosomes. This work defines  
20        a novel checkpoint that reinforces self vs. non-self discrimination by TLR9 and provides a mechanism by  
21        which TLR9 and TLR7 activation can be distinctly regulated.

22

23        **Main Text:**

24                To limit responses to extracellular self-nucleic acids, TLRs localize to intracellular compartments  
25        and require proteolytic cleavage within their ectodomains for activation<sup>7-10</sup>. The multi-pass  
26        transmembrane protein Unc93b1 is a trafficking chaperone for nucleic acid-sensing TLRs, facilitating  
27        trafficking of receptors from the ER to endosomes<sup>11</sup>. Unc93b1 is absolutely essential for endosomal TLR  
28        function, as humans and mice lacking functional Unc93b1 exhibit loss of endosomal TLR signaling and  
29        associated immunodeficiency<sup>12,13</sup>. Moreover, aberrant trafficking of endosomal TLRs due to mutations in  
30        Unc93b1 can lead to the breakdown of self versus non-self discrimination and contribute to autoimmune  
31        and autoinflammatory diseases in mouse models<sup>3,14</sup>. It remains unclear whether these alterations in TLR  
32        function are exclusively attributable to alterations in ER export. It has been suggested that Unc93b1 may  
33        regulate additional sorting steps to endosomes that are distinct between individual TLRs<sup>15</sup>, but recent  
34        work has argued that TLR function is unaltered when Unc93b1 is forcibly retained in the ER<sup>16</sup>. Thus, the  
35        mechanisms by which Unc93b1 contributes to the proper compartmentalization of endosomal TLRs and  
36        influences responses to different sources of nucleic acids remain unclear.

37                To dissect the mechanisms by which Unc93b1 regulates TLR signaling, we performed an  
38        unbiased alanine-scanning mutagenesis screen of Unc93b1. We stably expressed 204 individual FLAG-  
39        tagged Unc93b1 mutant alleles in a RAW264.7 macrophage cell line in which endogenous Unc93b1 was  
40        deleted by CRISPR/Cas9-mediated genome editing. To assess the impact of individual mutations on TLR  
41        function, we measured responses of each stable line after stimulation with ligands for Unc93b1-dependent  
42        TLRs (polyI:C for TLR3, R848 for TLR7, and CpG oligonucleotides for TLR9) and for an Unc93b1-

43 independent TLR (LPS for TLR4). The non-functional allele  $Unc^{H412R}$  (HR), previously identified by  
44 Beutler's group via an ENU mutagenesis screen<sup>13</sup>, served as a negative control.

45 The screen identified an  $Unc93b1$  mutation (SKN to AAA at residues 282-284 in loop 5,  
46 hereafter referred to as  $Unc93b1^{SKN}$ ) that specifically disrupted signaling of TLR9, but not signaling by  
47 TLR7 or TLR3 (Figs. 1a,b). We first considered whether the mutation prevented TLR9 exit from the ER  
48 by introducing the  $Unc93b1^{SKN}$  mutant into  $Unc93b1$ -deficient RAW cell lines expressing an HA-tagged  
49 version of TLR9. Surprisingly, TLR9 trafficking to endosomes appeared normal, as the level of receptor  
50 cleavage, which occurs in endosomes, was similar between  $Unc93b1^{WT}$ - and  $Unc93b1^{SKN}$ -expressing cells  
51 (Fig. 1c). We confirmed trafficking of  $Unc93b1^{SKN}$  to  $Lamp1^+$  endosomes by immunofluorescence  
52 microscopy (Fig. S1a). If anything, the overall amount of  $Unc93b1$  in endosomes seemed to be slightly  
53 higher in  $Unc93b1^{SKN}$ -expressing cells compared to wildtype. Because the only described function for  
54  $Unc93b1$  is as a trafficking chaperone, a mutant version disrupting TLR9 signaling without abrogating  
55 trafficking to endosomes was unexpected and suggested we may have uncovered a new trafficking-  
56 independent function for  $Unc93b1$ .

57 To validate these findings in primary cells, we transduced bone marrow-derived macrophages  
58 (BMMs) from  $Tlr9^{HA:GFP}Unc93b1^{-/-}$  mice with a retroviral vector driving expression of  $Unc93b1^{SKN}$  and  
59 tested TLR9 signaling. In  $Tlr9^{HA:GFP}$  mice the endogenous TLR9 gene has been modified to encode a C-  
60 terminal HA tag<sup>17</sup>. Again, TLR9 signaling was completely absent in  $Unc93b1^{SKN}$  BMMs despite normal  
61 receptor trafficking and a complete restoration of TLR7 signaling (Figs. S1b,c). To determine if a  
62 mutation of any single amino acid within the SKN motif was sufficient to recapitulate loss of TLR9  
63 signaling, we individually mutated each amino acid within the SKN motif to alanine. We found that the  
64 single S282A (SA) mutation was sufficient to abolish TLR9 signaling in an NF- $\kappa$ B luciferase reporter  
65 assay in HEK293T cells, whereas K283A and N284A showed no effect (Fig. S1d). Similar to the  
66  $Unc93b1^{SKN}$  mutant,  $Unc93b1^{S282A}$ -expressing RAW macrophages failed to respond to CpG-B or CpG-A  
67 oligonucleotides, while TLR7 and TLR3 responses were unaffected (Fig. 1d and Fig. S1e). TLR9-  
68 dependent induction of IFN $\beta$  after stimulation with CpG-A/Dotap was also abrogated (Fig. 1e). Again,  
69 the level of cleaved TLR9 in phagosomes was similar compared to wildtype, indicating normal trafficking  
70 (Fig. 1f). These results indicate that mutation of Ser282 in  $Unc93b1$  is sufficient to abrogate TLR9  
71 activation without altering TLR9 trafficking or influencing other  $Unc93b1$ -dependent TLRs.

72 We next investigated how  $Unc93b1^{S282A}$  interferes with TLR9 signaling. Based on the luminal  
73 position of the mutation (Fig. 1a), we reasoned that ligand recognition could be affected rather than signal  
74 transduction after ligand binding. To assess ligand binding, we fed RAW macrophages biotin-conjugated  
75 CpG-B, pulled down the ligand with streptavidin-beads, and compared the amount of bound TLR9.  
76  $Unc93b1^{S282A}$  mutant cells showed significantly less TLR9 bound to CpG-B, suggesting a reduced affinity

77 of TLR9 for ligand (Fig. 2a). To rule out differences in DNA uptake or sampling, we verified that all cell  
78 lines were equally capable of endocytosing CpG-B (Fig. 2b) and that the ligands were effectively  
79 delivered to Lamp1<sup>+</sup> endolysosomes containing TLR9 (Fig. S2).

80 We considered the possibility that a loss of interaction between Unc93b1<sup>S282A</sup> and TLR9 during  
81 trafficking could impair ligand binding and activation of TLR9. On the contrary, we observed greater  
82 interaction between TLR9 and the mutants Unc93b1<sup>SKN</sup> and Unc93b1<sup>S282A</sup> when compared to wildtype  
83 Unc93b1 (Figs. 2c and S3a). TLR7, an endosomal TLR whose signaling is unaffected by Unc93b1<sup>S282A</sup>,  
84 did not show greater interaction with either Unc93b1 mutant (Fig. S3b). Furthermore, stronger association  
85 with TLR9 was only observed for the S282A mutation, but not for mutations of the neighboring amino  
86 acids K283 and N284 (Fig. S3c). We confirmed the increased interaction between TLR9 and  
87 Unc93b1<sup>S282A</sup> in endosomes directly by isolating phagosomes with magnetic beads and measuring TLR9-  
88 Unc93b1 association by immunoprecipitation. Again, a higher interaction between TLR9 and  
89 Unc93b1<sup>S282A</sup> was observed (Fig. 2d). Taken together, these results show that TLR9 signaling inversely  
90 correlates with the extent of interaction between TLR9 and Unc93b1 and suggest that a stronger  
91 association between Unc93b1 and TLR9 may interfere with ligand binding by TLR9.

92 To better understand how the S282A mutation affects the association between Unc93b1 and  
93 TLR9, we examined the importance of neighboring residues within loop 5 of Unc93b1. We analyzed all  
94 triple-alanine mutants within our mutant library that spanned loop 5 of Unc93b1 for their impact on TLR9  
95 signaling and binding (Fig. 3a). Scattered throughout loop 5 were several Unc93b1 mutants that affected  
96 TLR9 signaling. However, within those identified mutations, five of them occurred in a row (spanning  
97 amino acids 270-284 and containing Ser282) and showed impaired TLR9 signaling, suggesting the  
98 existence of a larger region important for TLR9 function (Fig. 3b). When probing Unc93b1 mutants  
99 within this region for their impact on TLR9 binding, we found that mutations in the core part of this  
100 region (amino acids 276-281) completely abolished the interaction with TLR9 (Fig. 3c), whereas  
101 mutations in the boundaries of the region (amino acids 273-275 and 282-284), including Ser282,  
102 increased the interaction. Notably, both loss and increase of the Unc93b1-TLR9 interaction resulted in  
103 impaired TLR9 signaling, highlighting the importance of an optimal binding affinity for proper TLR9  
104 function. Note that mutation of amino acids 279-281 resulted in constitutive activation (Fig. 3b). We  
105 suspect that this TNF $\alpha$  production in the absence of TLR stimulation may be due to ER stress stemming  
106 from the abnormally high expression level of this Unc93b1 mutant (Fig. 3c). Despite constitutive levels of  
107 TNF $\alpha$ , R848 and LPS were able to further induce cytokine levels whereas CpG-B was not, suggesting an  
108 impaired TLR9 response also for this mutant. Most of the mutations had little or no effect on TLR7  
109 function (Fig 3b). Thus, these analyses have identified a region of Unc93b1 that is critical for interaction

110 with TLR9 and demonstrate that differential regulation of Unc93b1-dependent TLRs can be mediated  
111 through unique interactions between Unc93b1 and each receptor.

112 To identify the reciprocal binding region in TLR9 that engages with the loop 5 region of  
113 Unc93b1, we turned to a set of TLR9 chimeric variants in which varying segments of the juxtamembrane  
114 and transmembrane domains had been replaced with the corresponding sequence of TLR3<sup>4</sup>. As TLR3 is  
115 unaffected by Unc93b1<sup>S282A</sup> (Fig. S1d) we reasoned that this strategy could identify critical residues  
116 within TLR9 that mediate interaction with Unc93b1. We compared signaling of each TLR9 variant in  
117 cells expressing Unc93b1<sup>WT</sup> or Unc93b1<sup>S282A</sup>. These analyses identified a short motif of five amino acids  
118 (LSWDC) in the juxtamembrane region of TLR9 that when reverted to the corresponding TLR3 sequence  
119 (PFELL) restored function in the presence of Unc93b1<sup>S282A</sup> (Fig. 3d). We conclude that this short motif  
120 within TLR9 engages with loop 5 of Unc93b1; alterations in the residues of these interaction surfaces can  
121 increase or decrease TLR9-Unc93b1 binding, which influences TLR9 ligand binding and function.

122 The amino acids of loop 5 implicated in interaction with TLR9 are completely conserved between  
123 mouse and human, so we sought to validate the functional importance of this region for human Unc93b1.  
124 To do so, we looked for naturally occurring human variants in residues predicted to influence TLR9  
125 binding. Three SNPs have been reported in the NCBI Single Nucleotide Polymorphism Database  
126 (Fig. 3a), all occurring with very low frequencies (Minor Allele Frequencies between 8.5 - 9.1E-06). We  
127 cloned the three human Unc93b1 variants and tested them in HEK293T cells for their effect on TLR9  
128 signaling. Two variants (G270R and R277Q) positioned within the critical Unc93b1 binding region  
129 significantly reduced TLR9 signaling, whereas G283S had no effect (Fig. 3e). The reduction in signaling  
130 was specific to TLR9, as none of the human Unc93b1 variants reduced TLR7 signaling (Fig. S4). These  
131 results suggest that human genetic variants in this region of Unc93b1 may affect TLR9 function.

132 Based on the finding that an enhanced association with Unc93b1 is detrimental to TLR9 function,  
133 we reasoned that TLR9 might require release from Unc93b1 in endosomes prior to ligand binding and  
134 activation. If this model is correct, then (1) the association between TLR9 and Unc93b1 should be  
135 stronger in the ER and accordingly decrease in endosomes and (2) Unc93b1 should be absent from the  
136 active signaling complex of TLR9. We investigated each of these predictions in turn. First, we used  
137 cellular fractionation to separate ER and endosomes and measured the extent of TLR9-Unc93b1  
138 interaction in each organelle preparation (Fig. 4a). We immunoprecipitated TLR9 from pooled fractions  
139 enriched for endosomes or ER and measured the amount of associated Unc93b1 (Fig. 4a). Consistent with  
140 a release of TLR9 from Unc93b1 in endosomes, the association of Unc93b1 and TLR9 was greater in the  
141 ER than in endosomes (Fig. 4b). Furthermore, Unc93b1<sup>S282A</sup> showed an overall stronger association with  
142 TLR9, both in the ER and in endosomes, suggesting that the altered chemistry of the mutant might have  
143 an overall “sticky” effect on TLR9 that prevents efficient release in endosomes. Next, to test whether

144 Unc93b1 is absent from the active TLR9 signaling complex, we immunoprecipitated the signaling adaptor  
145 MyD88 after stimulation of cells and probed for associated TLR9 and Unc93b1. We were able to pull  
146 down abundant amounts of cleaved TLR9 in wildtype cells, as previously reported<sup>8</sup>; however, Unc93b1  
147 was not detectable within the signaling complex (Fig. 4c). As expected, Unc93b1<sup>S282A</sup>-expressing cells did  
148 not recruit MyD88 after stimulation, in accordance with their defective TLR9 response.

149 Based on these results we propose a release model, whereby TLR9 must dissociate from Unc93b1  
150 for efficient ligand binding to overcome the activation threshold for signaling. We speculate that Unc93b1  
151 might interfere with DNA recognition by keeping the receptor in an unfavorable conformation for ligand  
152 binding, which would explain the attenuated ligand binding of TLR9 when forcefully bound to  
153 Unc93b1<sup>S282A</sup> (Fig. 4d). To independently test this model, we sought to engineer a cysteine bridge  
154 between TLR9 and Unc93b1 to permanently tether the two proteins together and prevent release (Fig.  
155 S5a). We screened a panel of TLR9 and Unc93b1 cysteine mutants, focusing on the previously identified  
156 loop 5 binding region of Unc93b1 and the juxtamembrane region of TLR9. We identified a pair of  
157 Unc93b1 and TLR9 cysteine mutants (Unc93b1<sup>281C</sup> and TLR9<sup>812C</sup>) that trafficked to endosomes (Fig. 4e,  
158 bottom right) yet remained attached through an intermolecular disulfide bond, which could be visualized  
159 by SDS-PAGE under non-reducing conditions (Fig. 4e, top left, and Fig. S5b). Preventing release from  
160 Unc93b1 (i.e., coexpression of Unc93b1<sup>281C</sup> and TLR9<sup>812C</sup>) completely abrogated TLR9 signaling (Fig.  
161 4e, bottom left). Importantly, Unc93b1<sup>281C</sup> and TLR9<sup>812C</sup> were both functional when expressed with  
162 wildtype TLR9 and Unc93b1, respectively, ruling out the possibility that the cysteine mutations simply  
163 created non-functional proteins (Fig. 4e, bottom left, and Fig. S5c).

164 Finally, we asked if TLR7 also requires release from Unc93b1 for signaling. We separated ER  
165 from endosomes and compared the association of TLR7 and Unc93b1. Surprisingly, the interaction did  
166 not decrease in endosomes (Fig. 4f), suggesting that, unlike TLR9, TLR7 can bind ligand and signal  
167 while associated with Unc93b1. In fact, in an accompanying manuscript<sup>18</sup>, we describe how the continued  
168 association of TLR7 and Unc93b1 in endosomes facilitates the regulation of TLR7 signaling through a  
169 distinct mechanism from the one we describe here for TLR9. Instead of inhibiting ligand binding,  
170 Unc93b1 recruits a negative regulator of TLR7 signaling. Disruption of this interaction leads to TLR7-  
171 dependent autoimmunity<sup>18</sup>. Thus, Unc93b1 utilizes distinct mechanisms to regulate activation of TLR9  
172 and TLR7 in endosomes.

173 The differential regulation of TLR9 and TLR7 that we describe may explain the enigmatic  
174 observation of TLR9 and TLR7 contributing distinctly to the pathology of certain autoimmune  
175 diseases<sup>19,20</sup>. Inhibition of TLR9 function is strictly linked to proper trafficking, both through Unc93b1  
176 association, as we describe here, and through the requirement for ectodomain proteolysis. Accordingly,  
177 overexpression of TLR9 does not induce disease<sup>17</sup>. In contrast, TLR7 appears subject to more ‘tunable’



178 regulation that dampens but does not eliminate signaling, and overexpression of TLR7 is sufficient to  
179 break tolerance and drive autoimmunity<sup>2,5,6</sup>. Why distinct mechanisms of regulation have evolved for such  
180 functionally similar innate receptors remains unclear. One possibility is that differences in the trafficking  
181 of TLR7 and TLR9 influences the likelihood that self RNA or DNA will be encountered; indeed, TLR9  
182 traffics to endosomes via the plasma membrane while TLR7 is thought to bypass the plasma membrane<sup>15</sup>.  
183 Alternatively, the nature of the ligands recognized by each receptor may require differing degrees of  
184 tunability. Recent work has revealed that TLR7 and TLR8 ligands are quite simple (e.g., TLR7  
185 recognizes the purine nucleoside guanosine together with a 3-mer uridine-containing ssRNA)<sup>21-23</sup>. In this  
186 case, avoiding self-recognition may require more subtle modulation of signaling than is necessary for  
187 TLR9. Regardless of any teleological rationale, dissecting the mechanisms that underlie differential  
188 regulation of these TLRs should reveal new avenues for therapeutic manipulation of TLR activation.

189

## 190 **Methods**

191

### 192 Antibodies and Reagents

193 The following antibodies were used for immunoblots, immunoprecipitations, or flow cytometry: rat anti-  
194 HA as purified antibody or matrix (3F10; Roche), mouse anti-FLAG as purified antibody or matrix (M2;  
195 Sigma-Aldrich), anti-mLamp-1 (goat polyclonal, AF4320; R&D Systems), anti-calnexin (rabbit  
196 polyclonal; Enzo Life Sciences, ADI-SPA-860-F), anti-Myd88 (AF3109, R&D Systems), anti-Gapdh  
197 (GT239, GeneTex), anti-TNF $\alpha$ -APC (MP6-XT22; eBioscience), purified anti-CD16/32 Fc Block (2.4G2),  
198 goat anti-mouse IgG-AlexaFluor680 (Invitrogen), goat anti-mouse IgG-AlexaFluor680 (Invitrogen),  
199 rabbit anti-goat IgG-AlexaFluor680 (Invitrogen), goat anti-mouse IRDye 800CW (Licor), donkey anti-  
200 rabbit IRDye 680RD (Licor), goat anti-rat IRDye 800CW (Licor). For immunofluorescence: rat anti-HA  
201 (3F10; Roche), rabbit anti-Lamp1 (ab24170, Abcam), goat anti-rat AlexaFluor488 (Jackson  
202 Immunoresearch), goat anti-rabbit AlexaFluor647 (Jackson Immunoresearch). Cells were mounted in  
203 Vectashield Hard Set Mounting Medium for Fluorescence (Vector Laboratories). For ELISA: anti-mouse  
204 TNF $\alpha$  purified (1F3F3D4, eBioscience), anti-mouse TNF $\alpha$  Biotin (XT3/XT22, eBioscience), Streptavidin  
205 HRP (BD Pharmingen).

206 The following TLR ligands were used: CpG-B (ODN1668: TCCATGACGTTTCCTGATGCT, all  
207 phosphorothioate linkages) and CpG-A (ODN1585: G\*G\*GGTCAACGTTGAG\*G\*G\*G\*G\*G, asterix  
208 indicate phosphorothioate linkages) were synthesized by Integrated DNA Technologies (Cy3 or biotin  
209 was attached to the 5-prime end for imaging or biochemistry experiments), R848 (Invivogen), PolyIC  
210 HMW (Invivogen), and LPS (Invivogen). Human IL-1b was purchased from Invitrogen. NP-40 (Igepal  
211 CA-630) was purchased from Sigma-Aldrich. Saponin, was purchased from Acros. Lipofectamine-LTX

212 reagent (Invitrogen) was used for transient transfection of plasmid DNA. DOTAP liposomal transfection  
213 reagent (Roche) was used for transfection of CpG-A. OptiMEM-I (Invitrogen) was used as media to form  
214 nucleic acid complexes for transient transfections. Streptavidin Magnetic Beads for biotin pull downs and  
215 Protein G agarose were purchased from Pierce. Violet fluorescent reactive dye for live dead staining of  
216 cells for flow cytometry was purchased from Invitrogen. ProMag 1 Series-COOH Surfactant free  
217 magnetic beads (#25029) for phagosome preparations were purchased from Polysciences. For renilla  
218 luciferase assays we used Coelenterazine native (Biotum). For firefly luciferase assays we used Luciferin  
219 (Biosynth). Assays were performed in Passive Lysis Buffer, 5x (Promega).

220

### 221 Mice

222 Mice were housed under specific-pathogen-free conditions at the University of California, Berkeley. All  
223 mouse experiments were performed in accordance with the guidelines of the Animal Care and Use  
224 Committee at UC Berkeley. *Tlr9*<sup>HA:GFP</sup> mice were generated as previously described<sup>17</sup>.

225

### 226 Plasmid constructs

227 AccuPrime Pfx DNA polymerase (Invitrogen) was used for site directed mutagenesis using the  
228 QuikChange II Site-directed Mutagenesis protocol from Agilent Technologies. The following mouse stem  
229 cell virus (MSCV)-based retroviral vectors were used to express UNC93B1, TLR9, TLR7, and TLR3 in  
230 cell lines: MSCV-PuromCherry (IRES – PuromycinR-T2A-mCherry), MSCV2.2 (IRES-GFP), MSCV-  
231 Thy1.1 (IRES-Thy1.1), MIGR2 (IRES-hCD2). 3× FLAG (DYKDHDGDYKDHDIDYKDDDDK) was  
232 fused to the C-terminus of UNC93B1. TLR9, TLR7, and TLR3 were fused to HA (YPYDVPDYA) at the  
233 C-terminal end. TLR7 sequence was synthesized after codon optimization by Invitrogen's GeneArt Gene  
234 Synthesis service as previously described<sup>15</sup>. TLR9 chimeras of the juxtamembrane and transmembrane  
235 regions were previously described<sup>4</sup>.

236

### 237 Cells and tissue culture conditions

238 HEK293T cells were obtained from American Type Culture Collection (ATCC). GP2-293 packaging cell  
239 lines were obtained from Clontech. The above cell lines were cultured in DMEM complete media  
240 supplemented with 10% (vol/vol) FCS, L-glutamine, penicillin-streptomycin, sodium pyruvate, and  
241 HEPES (pH 7.2) (Invitrogen). RAW264 macrophage cell lines (ATCC) were cultured in RPMI 1640  
242 (same supplements as above).

243 BMMs were differentiated for seven days in RPMI complete media (same supplements as above  
244 plus 0.00034% (vol/vol) beta-mercaptoethanol) and supplemented with M-CSF containing supernatant  
245 from 3T3-CSF cells.



246 To generate HEK293T Unc93b1<sup>-/-</sup> cells, guide RNAs were designed and synthesized as gBlocks  
247 as previously described<sup>24</sup> and then were subcloned into pUC19 (guide RNA:  
248 CTCACCTACGGCGTCTACC). Humanized Cas9-2xNLS-GFP was a gift from the Doudna laboratory,  
249 University of California, Berkeley, CA. HEK293T cells were transfected using Lipofectamine LTX with  
250 equal amounts of the guide RNA plasmid and Cas9 plasmid. Seven days post transfection cells were  
251 plated in a limiting-dilution to obtain single cells. Correct targeting was verified by PCR analysis and loss  
252 of response to TLR9 and TLR7 stimulation in an NFκB luciferase assay. Unc93b1<sup>-/-</sup> RAW macrophages  
253 were generated with the Cas9(D10A)-GFP nickase (guide RNAs: 1)  
254 GGCGCTTGC GGCGGTAGTAGCGG, 2) CGGAGTGGTCAAGAACGTGCTGG, 3)  
255 TTCGGAATGCGCGGCTGCCGCGG, 4) AGTCCGCGGCTACCGCTACCTGG ). Macrophages were  
256 transfected with cas9(D10A) and all four guide RNAs using Lipofectamine LTX and Plus reagent and  
257 single cell-sorted on cas9-GFP two days later. Correct targeting was verified by loss of response to TLR7  
258 stimulation and sequencing of the targeted region after TOPO cloning.

259

#### 260 Retroviral transduction

261 For retroviral transduction of Raw macrophages, VSV-G-pseudotyped retrovirus was made in GP2-293  
262 packaging cells (Clontech). GP2-293 cells were transfected with retroviral vectors and pVSV-G using  
263 Lipofectamine LTX reagent. 24h post-transfection, cells were incubated at 32°C. 48h post-transfection  
264 viral supernatant (with polybrene at final 5µg/ml) was used to infect target cells overnight at 32°C and  
265 protein expression was checked 48 hr later. Target cells were sorted on an Aria Fusion Beckman Coulter  
266 Sorter to match expression or drug-selected with Puromycin, starting 48h after transduction. Efficiency of  
267 drug selection was verified by equal mCherry expression of target cells.

268 For retroviral transduction of bone marrow derived macrophages, bone marrow was harvested  
269 and cultured in M-CSF containing RPMI for two days. Progenitor cells were transduced with viral  
270 supernatant (produced as above) on two successive days by spinfection for 90min at 32°C. 48h after the  
271 second transduction cells were put on Puromycin selection and cultured in M-CSF containing RPMI  
272 media until harvested on day 8.

273

#### 274 Luciferase assays

275 Activation of NF-κB in HEK293T cells was performed as previously described<sup>8</sup>. Briefly, transfections  
276 were performed in OptiMEM-I (Invitrogen) with LTX transfection reagent (Invitrogen) according to  
277 manufacturer's guidelines. Cells were stimulated with CpG-B (200nM – 1µM), R848 (100-200ng/ml), or  
278 human IL-1b (20ng/ml) after 24h and lysed by passive lysis after an additional 12–16h. Luciferase  
279 activity was measured on a LMaxII-384 luminometer (Molecular Devices).

280

281 Immunoprecipitation and western blot analysis

282 Cells or purified phagosomes were lysed in NP-40 buffer (50 mM Tris [pH 7.4], 150 mM NaCl, 1% NP-  
283 40, 5 mM EDTA and supplemented with EDTA-free complete protease inhibitor cocktail; Roche and  
284 1mM PMSF). After incubation at 4°C on a rotator, lysates were cleared of insoluble material by  
285 centrifugation. For immunoprecipitations, lysates were incubated with anti-HA matrix, or anti-FLAG  
286 matrix (both pre-blocked with 1% BSA-PBS) overnight, and washed four times in lysis buffer the next  
287 day. Precipitated proteins were denatured in SDS-PAGE buffer at room temperature for 1h. Proteins were  
288 separated by SDS-PAGE (Bio-Rad TGX precast gels [Bio-Rad]) and transferred to Immobilon PVDF  
289 membranes (Millipore) in a Trans-Blot Turbo transfer system (Biorad). Membranes were probed with the  
290 indicated antibodies and developed using the Licor Odyssey Blot Imager. Relative band intensities were  
291 quantified using Fiji (ImageJ)<sup>25</sup>.

292 Streptavidin pull downs were performed on cells fed biotin-CpG-B for 4h, lysed in NP-40 buffer  
293 (same as above) and cleared of insoluble debris. Lysates were incubated for 2 h with streptavidin  
294 magnetic beads (pre-blocked with 1% BSA-PBS), rotated at 4 °C, and washed four times in lysis buffer.  
295 Precipitates were boiled in SDS buffer, separated by SDS-PAGE, and probed by anti-HA immunoblot.  
296 Cell lysis and co-immunoprecipitations for Myd88 pull downs were performed in the following buffer:  
297 50mM Tris-HCl pH 7.4, 150mM NaCl, 10% glycerol, 1% NP-40 and supplemented with EDTA-free  
298 complete protease inhibitor cocktail (Roche), PhosSTOP (Roche) and 1mM PMSF. Lysates were  
299 incubated overnight with anti-Myd88 antibody, rotating at 4°C, and then Protein G agarose (pre-blocked  
300 with 1% BSA-PBS) was added for additional 2h. Beads were washed four times in lysis buffer, incubated  
301 in SDS buffer at room temperature for 1h, separated by SDS-PAGE, and probed for the indicated  
302 antibodies.

303 For visualizing disulfide bond formation in RAW macrophages, cells were lysed in buffer  
304 containing 10% DDM/CHS detergent for 2h at 4°C. After removing insoluble material, lysates were  
305 incubated with HA matrix for 2-4h and washed four times in buffer containing 0.25% DDM/CHS. Protein  
306 was eluted in lysis buffer containing 10% DDM/CHS and 300µg/ml HA peptide for 1h at room  
307 temperature. Eluates were divided in half and denatured in either reducing (+DTT) or non-reducing (-  
308 DTT) SDS buffer for 1h at room temperature.

309

310 Flow cytometry

311 Cells were seeded into non-treated tissue culture 24-well plates or round-bottom 96-well plates. The next  
312 day cells were stimulated with the indicated TLR ligands. To measure TNFα production, BrefeldinA (BD  
313 GolgiPlug, BD Biosciences) was added to cells 30 min after stimulation, and cells were collected after an

314 additional 5.5h. Cells were stained for intracellular TNF $\alpha$  with a Fixation & Permeabilization kit  
315 according to manufacturer's instructions (eBioscience).

316 For measuring DNA uptake, cells were fed Cy3-fluorescent CpG-B for the indicated amounts of  
317 time (control cells for no uptake were pre-chilled and stimulated on ice). Cells were washed 3 times with  
318 ice-cold PBS, fixed in 1% PFA/2%FCS/PBS, and analyzed on an BD LSR Fortessa flow cytometer.

319

#### 320 Enzyme-linked immunosorbent assay (ELISA)

321 Cells were seeded into tissue culture-treated flat-bottom 96-well plates. The next day cells were  
322 stimulated with the indicated TLR ligands. For TNF $\alpha$  ELISAs NUNC Maxisorp plates were coated with  
323 anti-TNF $\alpha$  at 1.5 $\mu$ g/ml overnight at 4°C. Plates were then blocked with PBS + 1% BSA (w/v) at 37°C for  
324 1h before cell supernatants diluted in PBS + 1% BSA (w/v) were added and incubated at room  
325 temperature for 2hrs. Secondary anti-TNF $\alpha$  biotin was used at 1 $\mu$ g/ml followed by Streptavidin-HRP.  
326 Plates were developed with 1mg/mL OPD in Citrate Buffer (PBS with 0.05M NaH<sub>2</sub> PO<sub>4</sub> and 0.02M  
327 Citric acid, pH 5.0) with HCl acid stop.

328

#### 329 Quantitative PCR

330 Cells were lysed in RNAzol (Molecular Research Center) and RNA was purified using the Direct-zol  
331 RNA MiniPrep Plus kit (Zymo Research) according to manufacturer's instructions. RNA was treated with  
332 RQ1 RNase-free DNase (Promega) and concentrated using the RNA clean and concentrator-5 Kit (Zymo  
333 Research). cDNA was prepared from 100-500ng RNA with iScript cDNA synthesis kit, and quantitative  
334 PCR was performed with SYBR green on a StepOnePlus thermocycler (Applied Biosystems). Primers  
335 were synthesized by Integrated DNA Technologies. Primer sequences (PrimerBank): Ifnb1 F:  
336 AGCTCCAAGAAAGGACGAACA, Ifnb1 R: GCCCTGTAGGTGAGGTTGAT; Tnfa F:  
337 CAGGCGGTGCCTATGTCTC, Tnfa R: CGATCACCCCGAAGTTCAGTAG; Gapdh F:  
338 AGGTCGGTGTGAACGGATTTG, Gapdh R: GGGGTCGTTGATGGCAACA

339

#### 340 Microscopy

341 Coverslips (High-performance, 18x18mm, thickness no. 1 ½ Zeiss) were acid-washed in 3M HCl, washed  
342 extensively in water, dipped in 70% EtOH and allowed to air-dry. Cells were plated onto coverslips and  
343 allowed to settle overnight. The next day, cells were incubated with Cy3-CpG-A for 2hrs at 37°C.  
344 Coverslips were washed with PBS, fixed with 4% PFA/PBS for 15min, and permeabilized with 0.5%  
345 saponin/PBS for 5min. To quench PFA autofluorescence coverslips were treated with sodium  
346 borohydride/0.1% saponin/PBS for 10min. After washing 3x with PBS, cells were blocked in 1%  
347 BSA/0.1% saponin/PBS for 1h. Slides were stained in blocking buffer with anti-HA, and anti-LAMP1

348 (see antibodies above), washed with PBS and incubated for 45min with secondary antibodies. Cells were  
349 washed 3x in PBS and mounted in VectaShield Hard Set without Dapi. Cells were imaged on a Zeiss  
350 Elyra PS.1 with a 100x/1.46 oil immersion objective in Immersol 518F / 30°C (Zeiss). Z-Sections were  
351 acquired, with three grid rotations at each Z-position. The resulting dataset was SIM processed and  
352 Channel Aligned using Zeiss default settings in Zen. The completed super-resolution Z-Series was  
353 visualized and analyzed using Fiji (ImageJ). To compare the degree of colocalization of two proteins a  
354 single section from the middle of the Z-Series was selected and analyzed using a customized pipeline for  
355 object-based colocalization in Cell Profiler<sup>26</sup>. Briefly, primary objects (Unc93b1 vs Lamp1, or CpG-A vs  
356 TLR9) were identified and related to each other to determine the degree of overlap between objects. Data  
357 are expressed as % of object 1 colocalized with object 2. For some colocalization experiments, pixel  
358 intensities of two different fluorophores were measured by using the Plot Profile tool in Fiji to create a  
359 plot of intensity values along a line scan in the image.

360

#### 361 Phagosome isolation

362 Cells in a confluent 15cm dish were incubated with  $\sim 10^8$  1  $\mu\text{m}$  magnetic beads (Polysciences) for 4hrs.  
363 After rigorous washing in PBS, cells were scraped into 10 ml sucrose homogenization buffer (SHB:  
364 250  $\mu\text{M}$  sucrose, 3 mM imidazole pH 7.4) and pelleted by centrifugation. Cells were resuspended in 2 ml  
365 SHB plus protease inhibitor cocktail with EDTA (Roche) and 1mM PMSF and disrupted by 25 strokes in  
366 a steel dounce homogenizer. The disrupted cells were gently rocked for 10 min on ice to free endosomes.  
367 Beads were collected with a magnet (Dynal) and washed 4x with SHB plus protease inhibitor. After the  
368 final wash, phagosome preparations were denatured in 2x SDS buffer at room temperature for 1h and  
369 analyzed by western blot.

370

#### 371 Cell fractionation by sucrose density-centrifugation

372 Cells in four confluent 15cm dishes were washed in ice-cold PBS, scraped in 10ml sucrose  
373 homogenization buffer (SHB: 250  $\mu\text{M}$  sucrose, 3 mM imidazole pH 7.4) and pelleted by centrifugation.  
374 Cells were resuspended in 2 ml SHB plus protease inhibitor cocktail with EDTA (Roche) and 1mM  
375 PMSF and disrupted by 25 strokes in a steel dounce homogenizer. The disrupted cells were centrifuged  
376 for 10min at 1000g to remove nuclei. Supernatants were loaded onto continuous sucrose gradients  
377 (percent iodixanol: 0, 10, 20, 30) and ultracentrifuged in an SW41 rotor at 25800rpm for 2hrs (Optima L-  
378 90K Ultracentrifuge, Beckman Coulter). 22 fractions of 420 $\mu\text{l}$  were collected from top to bottom. 100 $\mu\text{l}$   
379 of each fraction were denatured in SDS buffer for western blot analysis. For immunoprecipitations, three  
380 fractions corresponding to ER or endosomes were combined and lysed for 1h after addition of protease

381 inhibitor cocktail and NP-40 to a final concentration of 1%. Coimmunoprecipitation with anti-HA matrix  
382 was performed as described above.

383

#### 384 Quantification and Statistical Analysis

385 Statistical parameters, including the exact value of n and statistical significance, are reported in the  
386 Figures and Figure Legends. Representative images have been repeated at least three times, unless  
387 otherwise stated in the figure legend. Data is judged to be statistically significant when  $p < 0.05$  by two-  
388 tailed Student's t-test. To compare the means of different groups, a one-way ANOVA followed by a  
389 Tukey's posttest was used. To compare means of different groups that have been split on two independent  
390 variables, a two-way ANOVA followed by a Bonferroni posttest was used. In figures, asterisks denote  
391 statistical significance (\*,  $p < 0.05$ ; \*\*,  $p < 0.01$ ; \*\*\*,  $p < 0.001$ ). Statistical analysis was performed in  
392 GraphPad PRISM 7 (Graph Pad Software Inc.).

393

#### 394 **References:**

- 395 1 Majer, O., Liu, B. & Barton, G. M. Nucleic acid-sensing TLRs: trafficking and  
396 regulation. *Curr Opin Immunol* **44**, 26-33, doi:10.1016/j.coi.2016.10.003 (2017).
- 397 2 Deane, J. A. *et al.* Control of toll-like receptor 7 expression is essential to restrict  
398 autoimmunity and dendritic cell proliferation. *Immunity* **27**, 801-810,  
399 doi:10.1016/j.immuni.2007.09.009 (2007).
- 400 3 Fukui, R. *et al.* Unc93B1 restricts systemic lethal inflammation by orchestrating Toll-like  
401 receptor 7 and 9 trafficking. *Immunity* **35**, 69-81, doi:10.1016/j.immuni.2011.05.010  
402 (2011).
- 403 4 Mouchess, M. L. *et al.* Transmembrane mutations in Toll-like receptor 9 bypass the  
404 requirement for ectodomain proteolysis and induce fatal inflammation. *Immunity* **35**, 721-  
405 732, doi:10.1016/j.immuni.2011.10.009 (2011).
- 406 5 Pisitkun, P. *et al.* Autoreactive B cell responses to RNA-related antigens due to TLR7  
407 gene duplication. *Science* **312**, 1669-1672, doi:10.1126/science.1124978 (2006).
- 408 6 Subramanian, S. *et al.* A Tlr7 translocation accelerates systemic autoimmunity in murine  
409 lupus. *Proc Natl Acad Sci U S A* **103**, 9970-9975, doi:10.1073/pnas.0603912103 (2006).
- 410 7 Barton, G. M., Kagan, J. C. & Medzhitov, R. Intracellular localization of Toll-like  
411 receptor 9 prevents recognition of self DNA but facilitates access to viral DNA. *Nat*  
412 *Immunol* **7**, 49-56, doi:10.1038/ni1280 (2006).

- 413 8 Ewald, S. E. *et al.* The ectodomain of Toll-like receptor 9 is cleaved to generate a  
414 functional receptor. *Nature* **456**, 658-662, doi:10.1038/nature07405 (2008).
- 415 9 Park, B. *et al.* Proteolytic cleavage in an endolysosomal compartment is required for  
416 activation of Toll-like receptor 9. *Nat Immunol* **9**, 1407-1414, doi:10.1038/ni.1669  
417 (2008).
- 418 10 Garcia-Cattaneo, A. *et al.* Cleavage of Toll-like receptor 3 by cathepsins B and H is  
419 essential for signaling. *Proc Natl Acad Sci U S A* **109**, 9053-9058,  
420 doi:10.1073/pnas.1115091109 (2012).
- 421 11 Kim, Y. M., Brinkmann, M. M., Paquet, M. E. & Ploegh, H. L. UNC93B1 delivers  
422 nucleotide-sensing toll-like receptors to endolysosomes. *Nature* **452**, 234-238,  
423 doi:10.1038/nature06726 (2008).
- 424 12 Casrouge, A. *et al.* Herpes simplex virus encephalitis in human UNC-93B deficiency.  
425 *Science* **314**, 308-312, doi:10.1126/science.1128346 (2006).
- 426 13 Tabeta, K. *et al.* The Unc93b1 mutation 3d disrupts exogenous antigen presentation and  
427 signaling via Toll-like receptors 3, 7 and 9. *Nat Immunol* **7**, 156-164, doi:10.1038/ni1297  
428 (2006).
- 429 14 Fukui, R. *et al.* Unc93B1 biases Toll-like receptor responses to nucleic acid in dendritic  
430 cells toward DNA- but against RNA-sensing. *J Exp Med* **206**, 1339-1350,  
431 doi:10.1084/jem.20082316 (2009).
- 432 15 Lee, B. L. *et al.* UNC93B1 mediates differential trafficking of endosomal TLRs. *Elife* **2**,  
433 e00291, doi:10.7554/eLife.00291 (2013).
- 434 16 Pelka, K. *et al.* The Chaperone UNC93B1 Regulates Toll-like Receptor Stability  
435 Independently of Endosomal TLR Transport. *Immunity* **48**, 911-922 e917,  
436 doi:10.1016/j.immuni.2018.04.011 (2018).
- 437 17 Roberts, A. W. *et al.* Tissue-Resident Macrophages Are Locally Programmed for Silent  
438 Clearance of Apoptotic Cells. *Immunity* **47**, 913-927 e916,  
439 doi:10.1016/j.immuni.2017.10.006 (2017).
- 440 18 Majer, O., Liu, B., Krogan, N. & Barton, G. M. Unc93b1 recruits Syntenin-1 to dampen  
441 TLR7 signaling and prevent autoimmunity. Submitted (2018).



- 442 19 Christensen, S. R. *et al.* Toll-like receptor 7 and TLR9 dictate autoantibody specificity  
443 and have opposing inflammatory and regulatory roles in a murine model of lupus.  
444 *Immunity* **25**, 417-428, doi:10.1016/j.immuni.2006.07.013 (2006).
- 445 20 Nickerson, K. M. *et al.* TLR9 regulates TLR7- and MyD88-dependent autoantibody  
446 production and disease in a murine model of lupus. *J Immunol* **184**, 1840-1848,  
447 doi:10.4049/jimmunol.0902592 (2010).
- 448 21 Shibata, T. *et al.* Guanosine and its modified derivatives are endogenous ligands for  
449 TLR7. *Int Immunol* **28**, 211-222, doi:10.1093/intimm/dxv062 (2016).
- 450 22 Tanji, H. *et al.* Toll-like receptor 8 senses degradation products of single-stranded RNA.  
451 *Nat Struct Mol Biol* **22**, 109-115, doi:10.1038/nsmb.2943 (2015).
- 452 23 Zhang, Z. *et al.* Structural Analysis Reveals that Toll-like Receptor 7 Is a Dual Receptor  
453 for Guanosine and Single-Stranded RNA. *Immunity* **45**, 737-748,  
454 doi:10.1016/j.immuni.2016.09.011 (2016).
- 455 24 Mali, P. *et al.* RNA-guided human genome engineering via Cas9. *Science* **339**, 823-826,  
456 doi:10.1126/science.1232033 (2013).
- 457 25 Schindelin, J. *et al.* Fiji: an open-source platform for biological-image analysis. *Nat*  
458 *Methods* **9**, 676-682, doi:10.1038/nmeth.2019 (2012).
- 459 26 Carpenter, A. E. *et al.* CellProfiler: image analysis software for identifying and  
460 quantifying cell phenotypes. *Genome Biol* **7**, R100, doi:10.1186/gb-2006-7-10-r100  
461 (2006).

462

463 **Acknowledgments:** We thank members of the Barton and Vance Lab for helpful discussions and critical  
464 reading of the manuscript. We thank Baobin Li and Stephen Brohawn for supplying the DDM/CHS  
465 detergent and for technical advice. We thank Hector Nolla and Alma Valeros for assistance with cell  
466 sorting at the Flow Cytometry Facility of the Cancer Research Laboratory at UC Berkeley. We thank  
467 Steven Ruzin and Denise Schichnes for assistance with microscopy on the Zeiss Elyra PS.1 at the  
468 Biological Imaging Center at UC Berkeley. This work was supported by the NIH (AI072429, AI105184  
469 and AI063302 to G.M.B.) and by the Lupus Research Institute (Distinguished Innovator Award to  
470 G.M.B.). O.M. was supported by an Erwin Schrödinger (J 3415-B22) and CRI Irvington postdoctoral  
471 fellowship. B.J.W. was supported by a summer undergraduate research fellowship from UC Berkeley.  
472 B.L. was supported by the UC Berkeley Tang Distinguished Scholars Program. Research reported in this

473 publication was supported in part by the National Institutes of Health S10 program under award  
474 number 1S10OD018136-01.

475

476 **Author Contributions:** O.M. and G.M.B designed experiments. O.M., B.J.W., and E.V.D. performed  
477 experiments and analyzed the data. O.M. and B.L. performed the initial alanine mutagenesis screen. O.M.  
478 wrote the manuscript. G.M.B. revised and edited the manuscript.

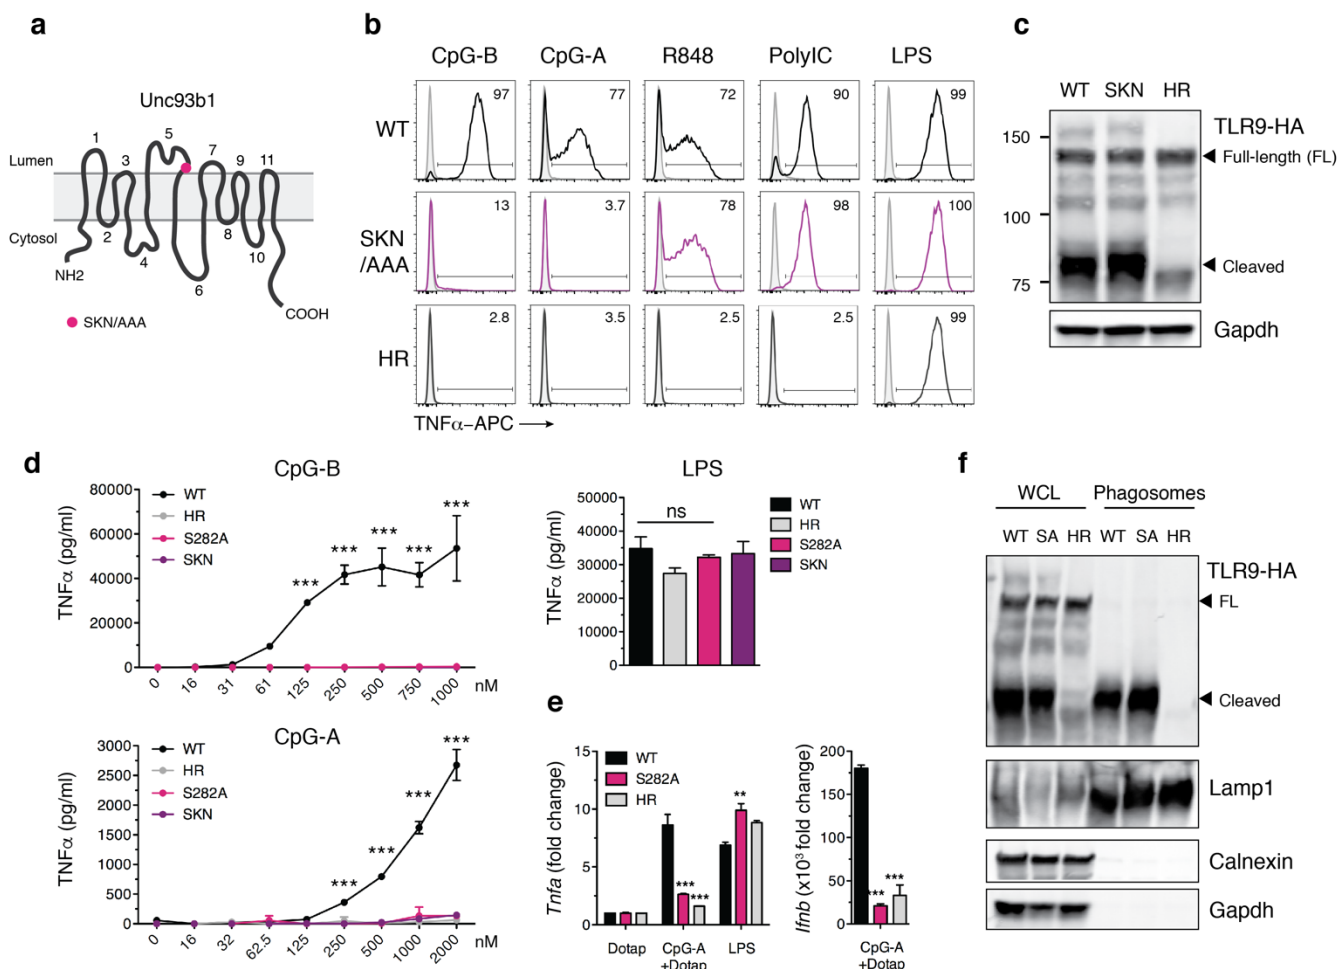

**Fig. 1. An Unc93b1 mutation in loop 5 results in defective TLR9 signaling despite normal trafficking.** (a) Domain structure of Unc93b1 with position of the SKN mutation. (b) Unc93b1<sup>SKN</sup> selectively impairs TLR9 signaling in RAW macrophages. Representative flow cytometry analysis showing percent TNF $\alpha$  positive cells, measured by intracellular cytokine staining of Unc93b1-deficient RAW macrophages retrovirally transduced to express the indicated Unc93b1 alleles (WT, SKN, and non-functional HR) after stimulation with CpG-B and CpG-A (150nM) for TLR9, R848 (25ng/ml) for TLR7, PolyIC (500ng/ml) for TLR3, or LPS (10ng/ml) for TLR4. For PolyIC responses RAW macrophages were additionally retrovirally transduced to express TLR3-HA. (c) TLR9 trafficking is normal in Unc93b1<sup>SKN</sup> macrophages. Immunoblot of TLR9 from lysates of RAW macrophage lines shown in (b). (d) Unc93b1<sup>S282A</sup> is sufficient for the TLR9 signaling defect. TNF $\alpha$  production, measured by ELISA, from the indicated RAW macrophage lines after stimulation for 8h with CpG-B, CpG-A, or LPS (50ng/ml) (n=3, representative experiment of two independent repeats). (e) Quantitative RT-PCR analysis of *Tnfa* and *Ifnb* expression in the indicated RAW macrophage lines 8h after stimulation with CpG-A/DOTAP (1 $\mu$ M) or LPS (10ng/ml) (n=3, representative experiment of two independent repeats). (f) Unc93b1<sup>S282A</sup> does not affect TLR9 trafficking to endosomes. Whole cell lysates (WCL) or lysates of phagosomes isolated from the indicated RAW macrophage lines were probed for levels of TLR9, Lamp1, Calnexin, and GAPDH by immunoblot; FL: full-length. All data are mean  $\pm$  SD; \*P < 0.05, \*\*P < 0.01, \*\*\*P < 0.001 by unpaired Student's t-test (qRT-PCR) or two-way ANOVA followed by a Bonferroni posttest (ELISA). The data are representative of at least three independent experiments, unless otherwise noted.

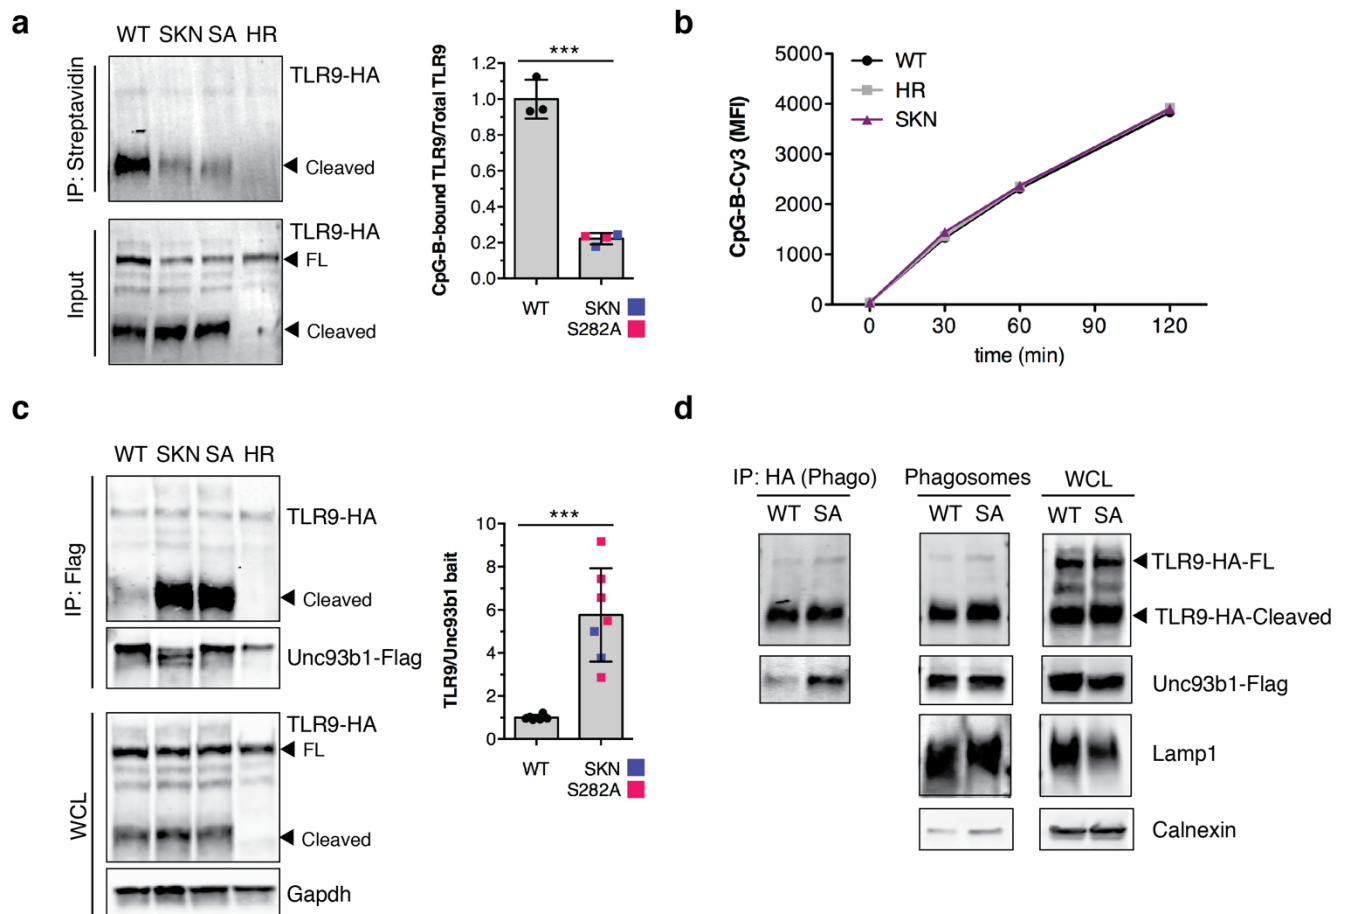

**Fig. 2. Unc93b1<sup>S282A</sup> attenuates ligand binding and increases association with TLR9.** (a) Unc93b1<sup>SKN</sup> and Unc93b1<sup>S282A</sup> attenuate ligand binding of TLR9. Streptavidin immunoprecipitation of lysates from RAW macrophage lines, expressing TLR9-HA and the indicated Unc93b1 alleles, stimulated for 4h with biotinylated CpG-B (1 $\mu$ M) followed by immunoblot for TLR9. Bar graph shows quantification of CpG-bound TLR9 over total TLR9 from several experiments. (b) Unc93b1<sup>SKN</sup> cells show normal DNA uptake. Uptake of Cy3-labeled CpG-B (1 $\mu$ M) as measured by flow cytometry of RAW macrophage lines expressing the indicated alleles of Unc93b1. (c) Unc93b1<sup>SKN</sup> and Unc93b1<sup>S282A</sup> bind stronger to TLR9. Flag immunoprecipitation of Unc93b1 from RAW macrophage lines, expressing TLR9-HA and the indicated Unc93b1 alleles, followed by immunoblot of TLR9. Input levels of TLR9 in whole cell lysates (WCL) are also shown. Bar graph shows quantification of TLR9 bound to Unc93b1 from several experiments. (d) HA immunoprecipitation of TLR9 from phagosome preparations of RAW macrophage lines, expressing TLR9-HA and the indicated Unc93b1 alleles, followed by immunoblot for Unc93b1. Input levels of TLR9 and Unc93b1 in phagosomes and whole cell lysates (WCL) are also shown; FL: full-length. Representative of two independent experiments. All data are mean  $\pm$  SD; \*P < 0.05, \*\*P < 0.01, \*\*\*P < 0.001 by unpaired Student's t-test. The data are representative of at least three independent experiments, unless otherwise noted.

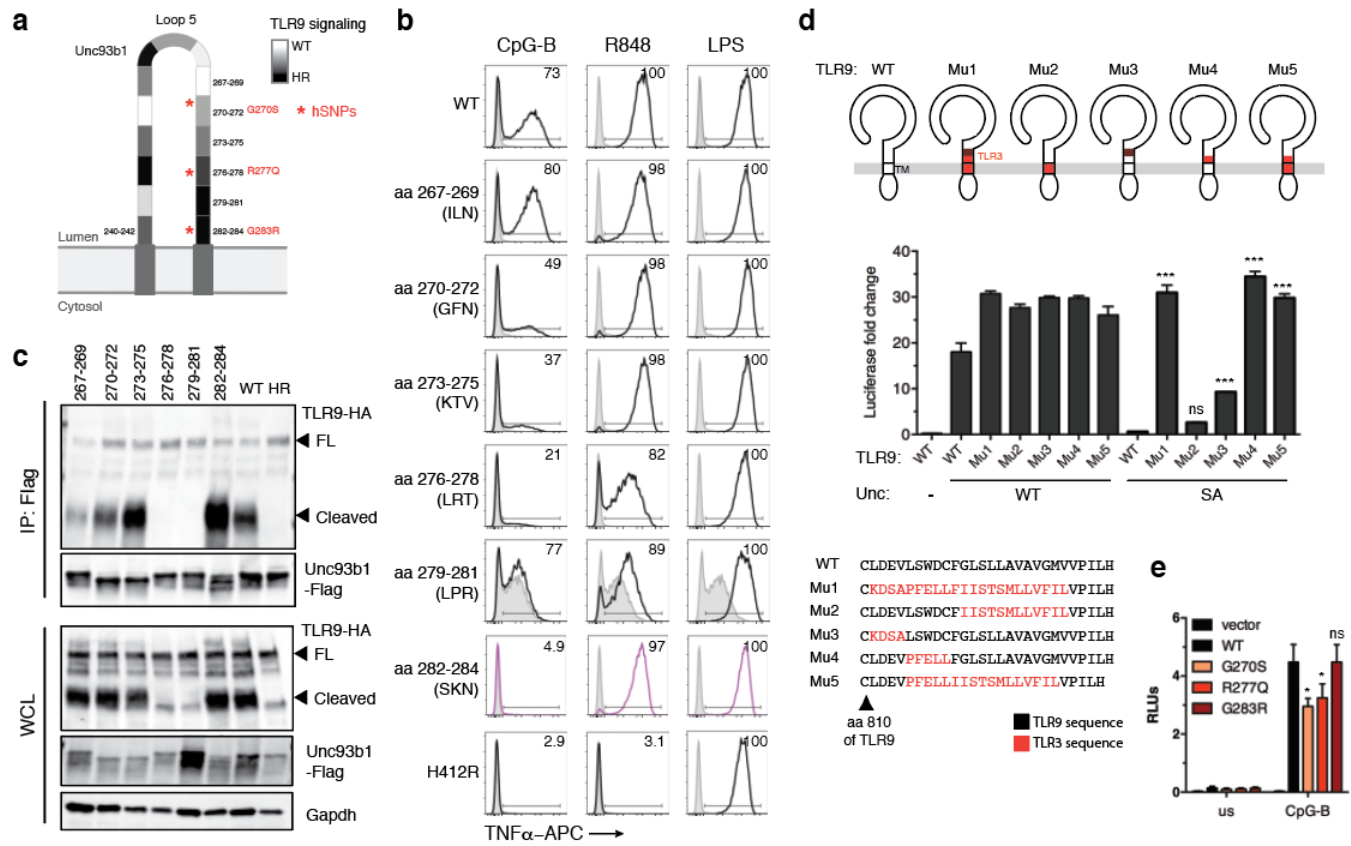

**Fig. 3. Identification of residues within loop 5 of Unc93b1 that mediate interaction with TLR9.** (a) Schematic of the tested mutants in loop 5 of Unc93b1 and the relative TLR9 responses indicated in shades of grey: white indicates a response equivalent to WT while black indicates no response. (b) A larger region in loop 5 of Unc93b1 is important for TLR9 signaling. Representative flow cytometry analysis showing percent TNF $\alpha$  positive cells, measured by intracellular cytokine staining of RAW macrophages retrovirally transduced to express the indicated Unc93b1 mutants (spanning amino acids 267-284, and non-functional HR) after stimulation with CpG-B (25nM) for TLR9, R848 (100ng/ml) for TLR7, and LPS (10ng/ml) for TLR4. Representative of three independent experiments. (c) A larger region in loop 5 of Unc93b1 mediates binding to TLR9. Flag immunoprecipitation of Unc93b1 from RAW macrophage lines, expressing TLR9-HA and the indicated Unc93b1 alleles, followed by immunoblot of TLR9. Input levels of TLR9 and Unc93b1 in whole cell lysates (WCL) are also shown; FL: full-length. Representative of two independent experiments. (d) Schematics showing relative positions and a sequence alignment (bottom) of swapped regions within the TLR9 chimeras. NF $\kappa$ B activation was measured by luciferase assay in HEK293T cells transiently transfected with the indicated TLR9 and Unc93b1 variants and stimulated with CpG-B (200nM) for 16h. Data are normalized to Unc93b1-independent hIL-1b responses and expressed as luciferase fold change over unstimulated controls (n=4, representative of two independent experiments). One-way ANOVA results: F(5/12)=300.0,  $p < 0.0001$  (e) NF- $\kappa$ B luciferase assay in HEK293T cells expressing TLR9 and the indicated human Unc93b1 variants and stimulated with CpG-B (250nM) for 16hrs. Data is normalized to Renilla expression and expressed as relative luciferase units (RLUs) (n=7, pooled from two independent experiments). One-way ANOVA results: F(3/12)=9.45,  $p = 0.0017$  All data are mean  $\pm$  SD; \*P < 0.05, \*\*P < 0.01, \*\*\*P < 0.001 by one-way ANOVA followed by a Tukey's posttest.



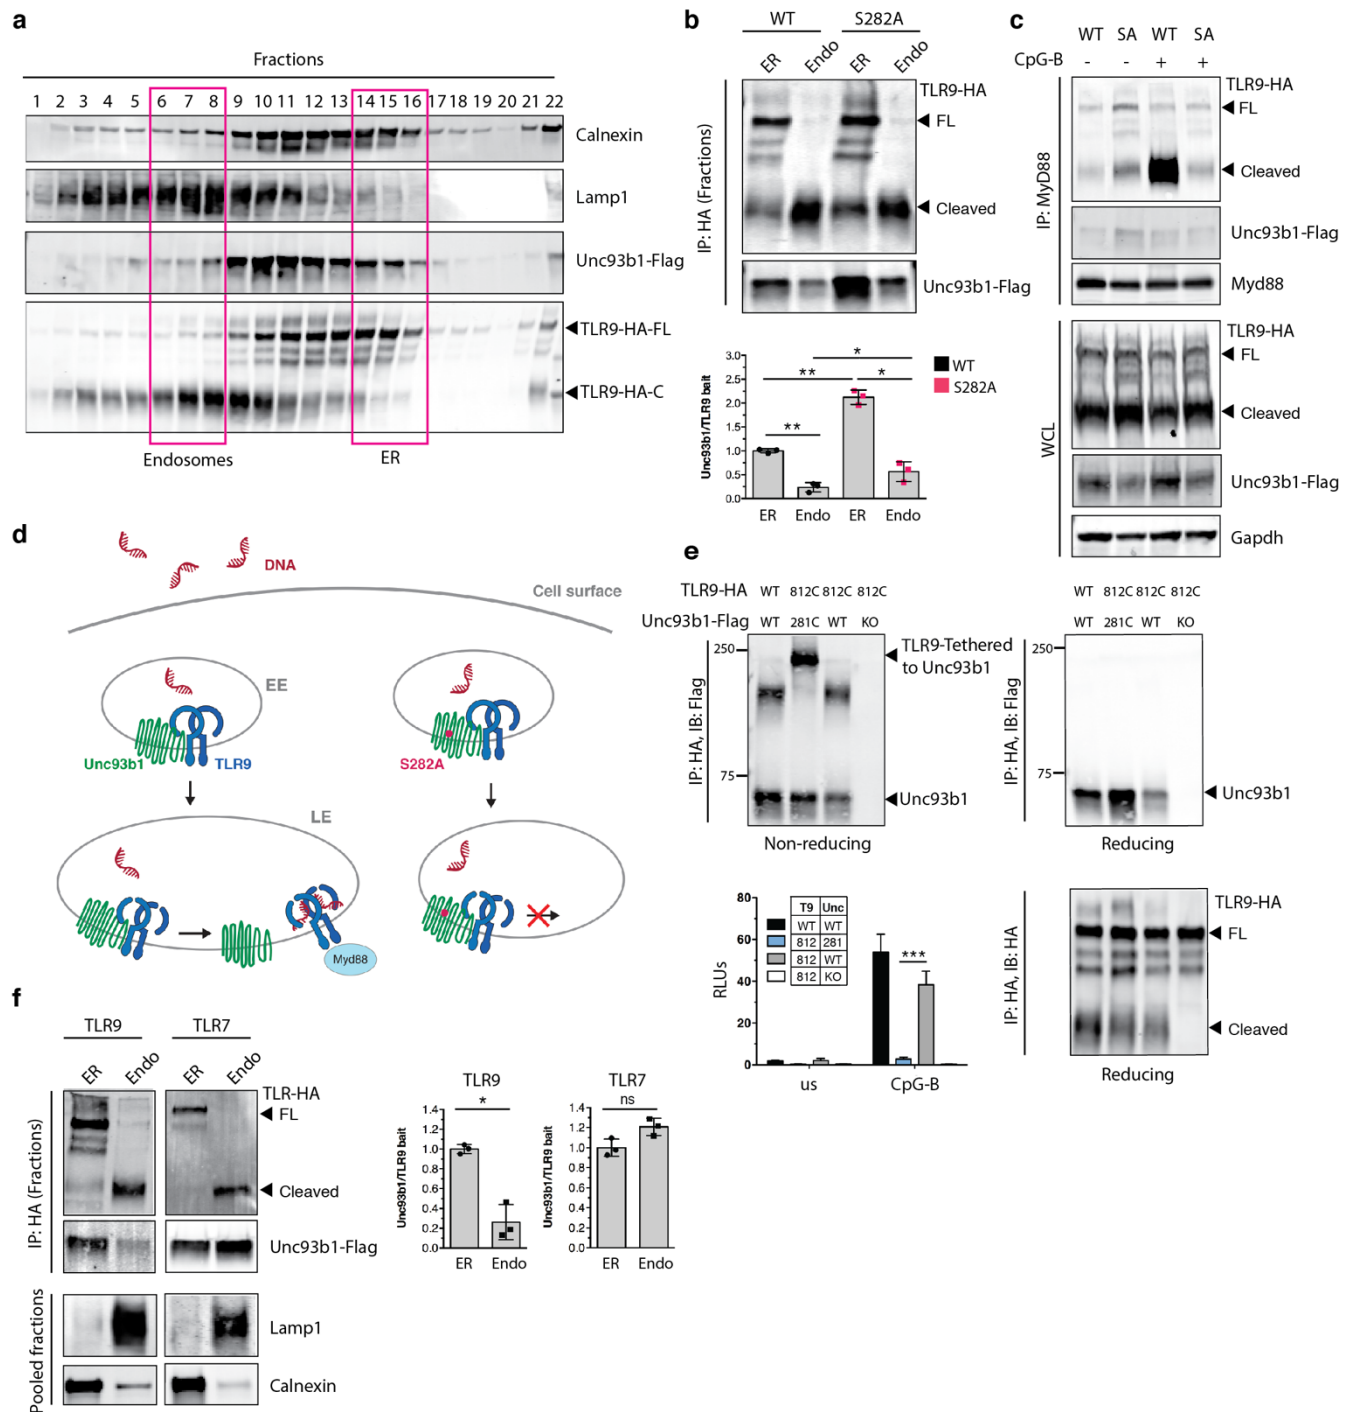

**Fig. 4. TLR9, but not TLR7, must release from Unc93b1 for signaling.** (a) Sub-cellular fractionation of TLR9-HA, Unc93b1-FLAG expressing RAW macrophages was performed by density-gradient centrifugation. The distributions of Calnexin, Lamp1, Unc93b1, and TLR9 were measured by immunoblot. The pooled fractions, enriched for endosomes or ER, used for subsequent coimmunoprecipitation experiments are highlighted. (b) The TLR9-Unc93b1 association is reduced in endosomes compared to the ER. HA immunoprecipitation of TLR9 from pooled ER or endosome fractions (as shown in (a)) from RAW macrophage lines expressing TLR9-HA and the indicated Unc93b1 alleles. Immunoprecipitated TLR9-HA levels were normalized across fractions and probed for levels of Unc93b1. Bar graph shows the quantification of Unc93b1 bound to TLR9 across fractions. (c) Unc93b1 is absent from the active TLR9 signaling complex. Immunoprecipitation of MyD88 from RAW



macrophage lines expressing TLR9-HA and the indicated Unc93b1 alleles and stimulated for 1h with CpG-B (1 $\mu$ M), followed by immunoblot for TLR9 and Unc93b1. Shown are also input levels of TLR9 and Unc93b1 in whole cell lysates (WCL). Representative of two independent experiments. **(d)** Release model of TLR9. **(e)** Unc93b1-tethered TLR9 is unable to signal. HA immunoprecipitation of TLR9 under non-reducing conditions from RAW macrophage lines expressing the indicated TLR9 and Unc93b1 cysteine mutants. Eluted proteins were either treated with the reducing agent dithiothreitol or left untreated and probed for Unc93b1. The non-reducing condition visualizes disulfide-bond formation between Unc93b1 and TLR9, which disappears after treatment with dithiothreitol (reducing condition). Bar graph shows an NF- $\kappa$ B luciferase assay in HEK293T cells expressing the indicated cysteine mutant combinations and stimulated with CpG-B (1 $\mu$ M) for 16hrs. Data are normalized to Renilla expression and expressed as relative luciferase units (RLUs) (n=4; representative of three independent experiments). **(f)** TLR7 does not release from Unc93b1 in endosomes. HA immunoprecipitation of TLR9 and TLR7 from pooled ER or endosome fractions of RAW macrophage lines expressing WT Unc93b1. Immunoprecipitated TLR-HA levels were normalized across fractions and probed for levels of Unc93b1. Bar graph shows the quantification of Unc93b1 bound to TLR9 or TLR7 between ER and endosome fractions; FL: full-length. All data are mean  $\pm$  SD; \*P < 0.05, \*\*P < 0.01, \*\*\*P < 0.001 by paired Student's t-test (**b**, **f**) or unpaired Student's t-test (**e**). The data are representative of at least three independent experiments, unless otherwise noted.

Supplementary Materials for

**An essential checkpoint for TLR9 signaling is release from Unc93b1 in endosomes**

Olivia Majer, Brian J Woo, Bo Liu, Erik Van Dis, and Gregory M Barton

Correspondence to: [barton@berkeley.edu](mailto:barton@berkeley.edu)

**This PDF file includes:**

Figs. S1 to S5

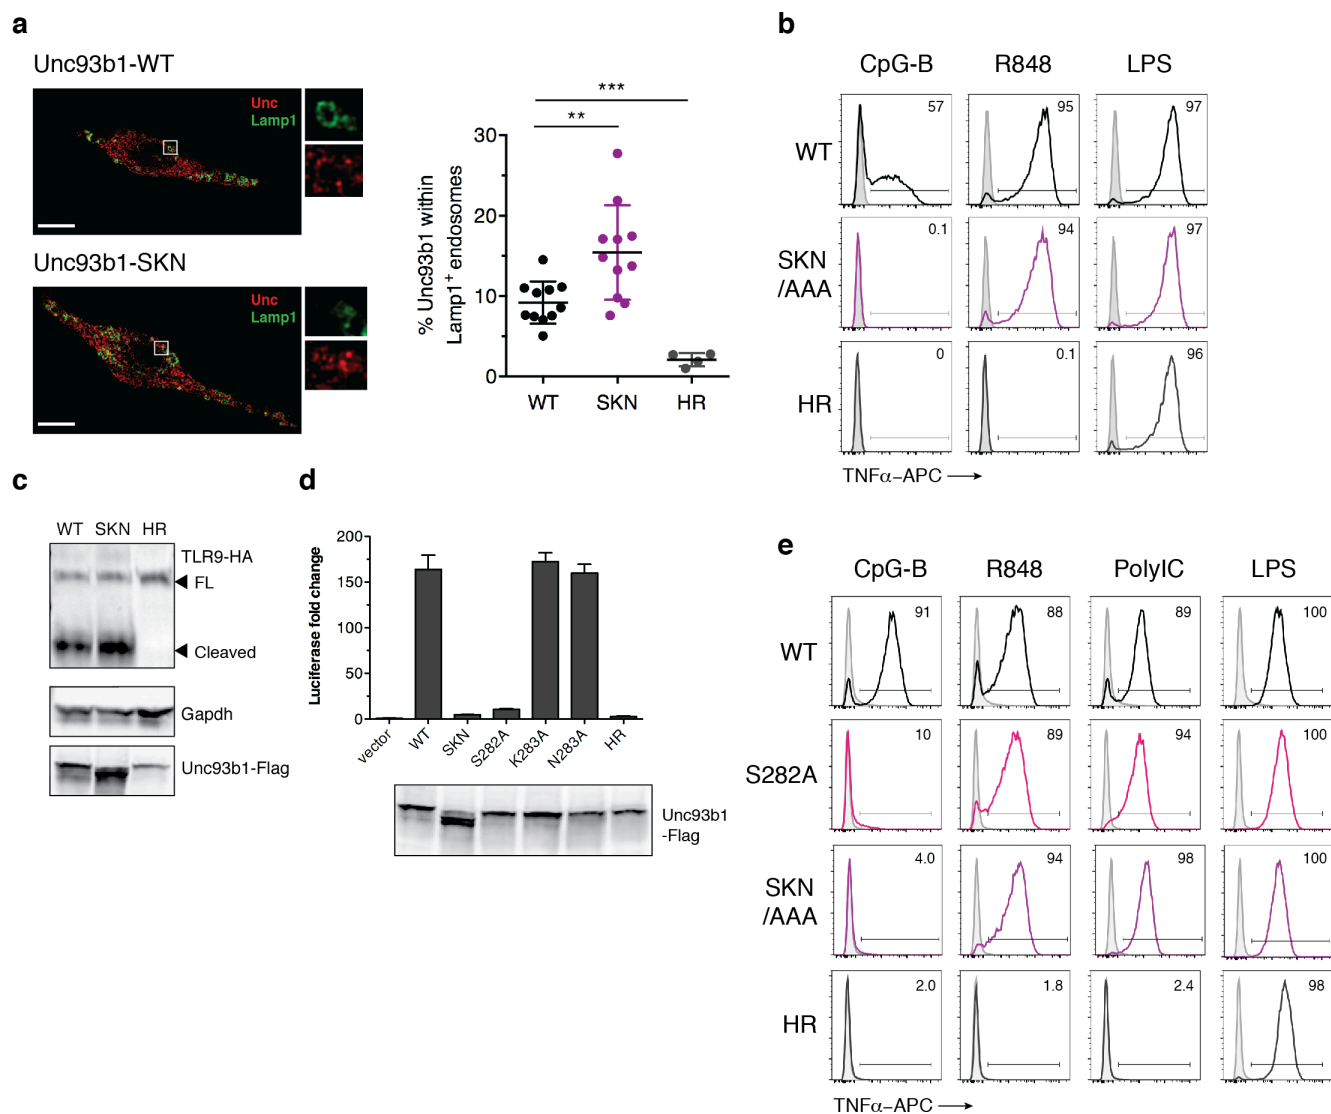

**Fig. S1. A luminal Unc93b1 mutation results in defective TLR9 signaling despite normal trafficking. (a)** Colocalization of Unc93b1 and Lamp1 in RAW macrophages expressing the indicated Unc93b1 alleles using superresolution structured illumination microscopy. Shown are representative Unc93b1<sup>WT</sup> and Unc93b1<sup>SKN</sup> cells: Unc93b1 (red) and Lamp1 (green). Boxed areas are magnified. The plot shows quantification of the percentage of total Unc93b1 within Lamp1<sup>+</sup> endosomes. Each dot represents an individual cell imaged in a single experiment. Scale bars: 10 $\mu$ m. **(b)** Unc93b1<sup>SKN</sup> selectively impairs TLR9 signaling in primary macrophages. Representative flow cytometry analysis showing percent TNF $\alpha$  positive cells, measured by intracellular cytokine staining, of BMMs from *Tlr9*<sup>HA:GFP</sup> *Unc93b1*<sup>-/-</sup> mice expressing the indicated Unc93b1 alleles (WT, SKN, and non-functional HR mutant) after stimulation with CpG-B (1 $\mu$ M) for TLR9, R848 (50ng/ml) for TLR7, and LPS (10ng/ml) for TLR4. **(c)** TLR9 trafficking is normal in Unc93b1<sup>SKN</sup>-expressing BMMs. Immunoblot of TLR9 from lysates of the same BMMs shown in **(b)**; FL: full-length. **(d)** Unc93b1<sup>S282A</sup> is sufficient for the TLR9 signaling defect. NF $\kappa$ B activation was measured by luciferase assay in HEK293T cells transiently transfected with TLR9 and the indicated Unc93b1 alleles and stimulated with CpG-B (1 $\mu$ M) for 16hrs. Data is normalized to Unc93b1-independent hIL-1b responses and expressed as luciferase fold change over unstimulated controls (n=4). Blot below shows Unc93b1 expression levels. **(e)** Unc93b1<sup>S282A</sup> recapitulates the Unc93b1<sup>SKN</sup>-mediated TLR9 signaling defect in RAW macrophages. Representative flow cytometry analysis showing percent TNF $\alpha$  positive cells, measured by intracellular cytokine staining, of RAW macrophage lines expressing the indicated Unc93b1

alleles after stimulation with CpG-B (1 $\mu$ M) for TLR9, R848 (100ng/ml) for TLR7, PolyIC (100ng/ml) for TLR3, and LPS (10ng/ml) for TLR4. RAW macrophages used here were retrovirally transduced to express TLR3-HA. All data are mean  $\pm$  SD; \*P < 0.05, \*\*P < 0.01, \*\*\*P < 0.001 by unpaired Student's t-test. The data are representative of at least two independent experiments, unless otherwise noted.

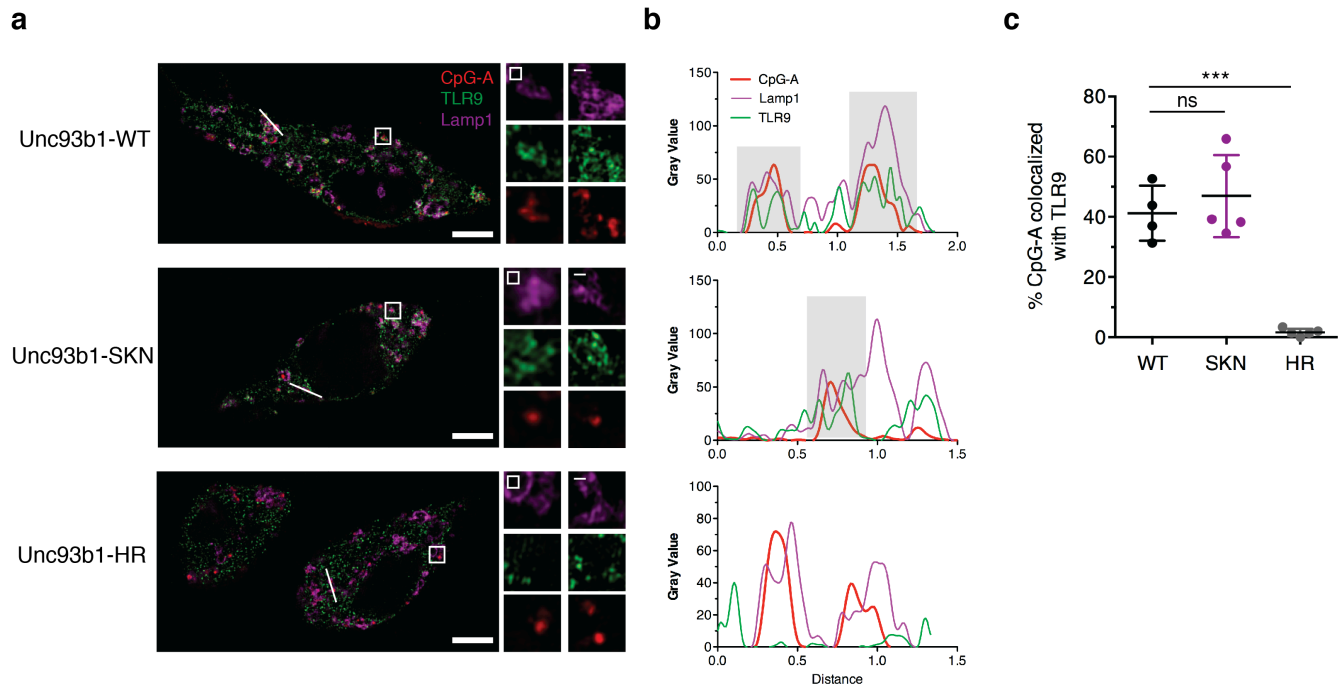

**Fig. S2. *Unc93b1*<sup>S282A</sup> does not affect the DNA delivery to TLR9-containing endosomes.** Colocalization of CpG-A, TLR9, and Lamp1 was determined in RAW macrophage lines expressing the indicated *Unc93b1* alleles after incubation with Cy3-labeled CpG-A (1  $\mu$ M) for 2hrs using superresolution structured illumination microscopy. **(a)** Shown are representative cells: TLR9 (green), Lamp1 (magenta), and CpG-A (red). Boxed areas and areas containing white lines are magnified. **(b)** The histograms display fluorescent intensity plots of pixels along the white lines. Shaded areas highlight regions of colocalization of CpG-B, TLR9, and Lamp1. **(c)** The plot shows quantification of the percentage of CpG-A colocalized with TLR9. Each dot represents an individual cell imaged in a single experiment. Scale bars: 5  $\mu$ m. Data are mean  $\pm$  SD; \* $P < 0.05$ , \*\* $P < 0.01$ , \*\*\* $P < 0.001$  by unpaired Student's t-test.

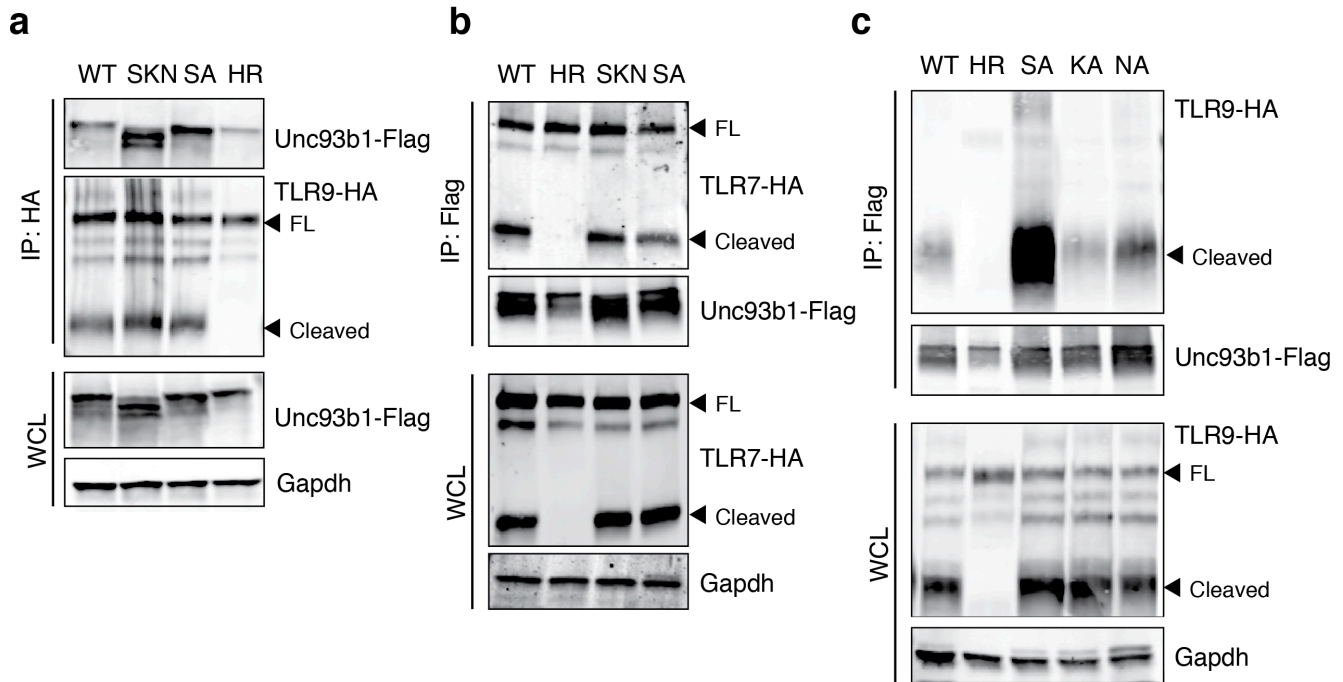

**Fig. S3. The stronger interaction is specific to Unc93b1<sup>S282A</sup> and TLR9.** (a) Unc93b1<sup>SKN</sup> and Unc93b1<sup>S282A</sup> bind stronger to TLR9. HA immunoprecipitation of TLR9 from RAW macrophage lines, expressing the indicated Unc93b1 alleles, followed by immunoblot of Unc93b1. Input levels of Unc93b1 in whole cell lysates (WCL) are also shown. (b) Unc93b1<sup>SKN</sup> and Unc93b1<sup>S282A</sup> do not affect the interaction with TLR7. Flag immunoprecipitation of Unc93b1 from RAW macrophage lines, expressing TLR7-HA and the indicated Unc93b1 alleles, followed by immunoblot of TLR7. Input levels of TLR7 in whole cell lysates (WCL) are also shown. (c) Only Unc93b1<sup>S282A</sup>, but not Unc93b1<sup>K283A</sup> or Unc93b1<sup>N284A</sup>, bind stronger to TLR9. Flag immunoprecipitation of Unc93b1 from RAW macrophage lines, expressing the indicated Unc93b1 alleles, followed by immunoblot of TLR9. Input levels of TLR9 in whole cell lysates (WCL) are also shown; FL: full-length. The data are representative of at least two independent experiments, unless otherwise noted.



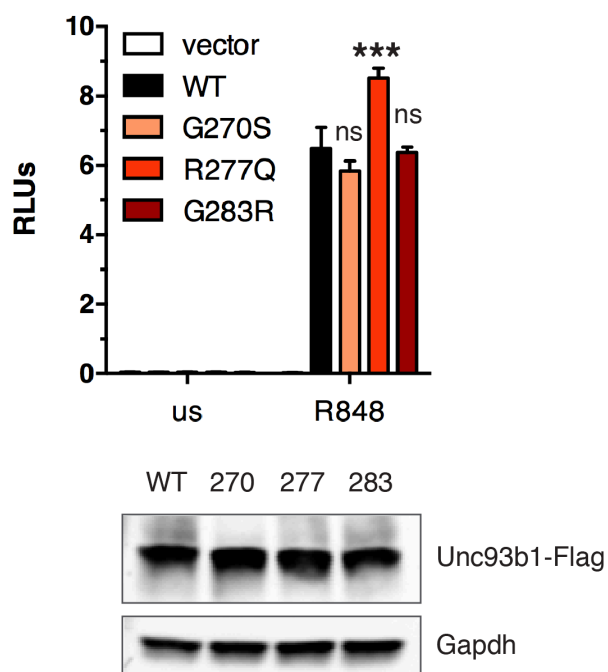

**Fig. S4. Human Unc93b1 variants do not reduce TLR7 signaling.** NF $\kappa$ B activation was measured by luciferase assay in HEK293T cells transiently transfected with TLR7 and the indicated human Unc93b1 variants and stimulated with R848 (250ng/ml) for 16hrs. Data are normalized to Renilla expression and expressed as relative luciferase units (RLUs) (n=3, representative of three independent experiments). Expression levels of human Unc93b1 variants are shown below. All data are mean  $\pm$  SD; \*P < 0.05, \*\*P < 0.01, \*\*\*P < 0.001 by one-way ANOVA followed by a Tukey's posttest. On-way ANOVA results: F(3/8)=29.70, p=0.0001

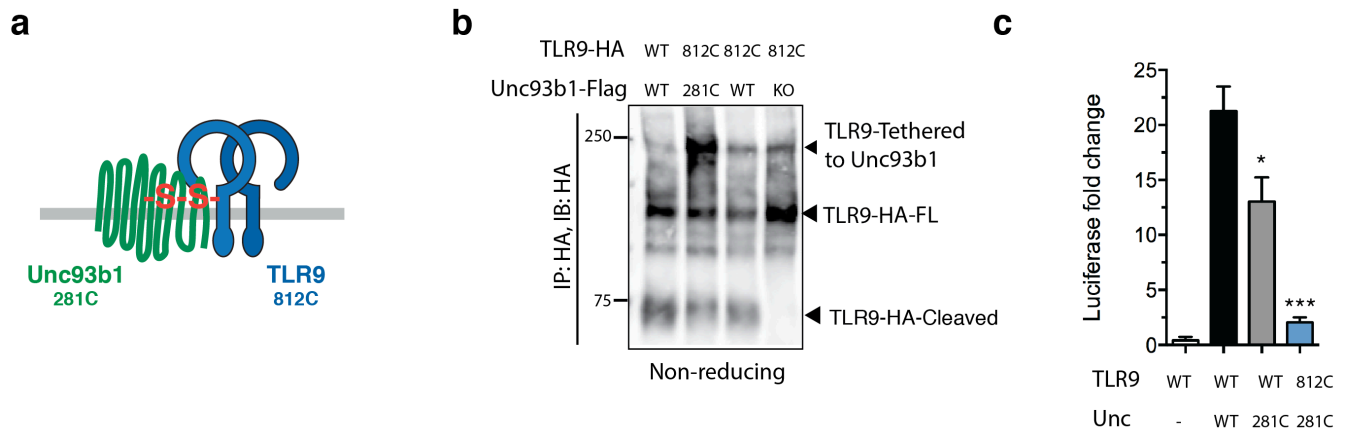

**Fig. S5. Tethering of TLR9 and Unc93b1.** (a) Schematic of the disulfidebond-tethered Unc93b1-TLR9 complex. The engineered cysteine position in either protein is indicated. (b) Unc93b1-tethered TLR9 is unable to signal. HA immunoblot under non-reducing conditions after HA immunoprecipitation of TLR9 from RAW macrophage lines expressing the indicated TLR9 and Unc93b1 cysteine mutants. The high molecular weight band indicates disulfide-bond formation between Unc93b1 and TLR9. Representative blot out of two independent experiments. (c) NF $\kappa$ B luciferase assay in HEK293T cells expressing the indicated cysteine mutant combinations and stimulated with CpG-B (1 $\mu$ M) for 16hrs. Data are normalized to Renilla expression and expressed as luciferase fold change over unstimulated controls (n=3, representative of three independent experiments).
